# Supplementary material for: Oral vaccination stimulates neutrophil functionality and exerts protection in a Mycobacterium avium subsp. paratuberculosis infection model
Source: PubMed Central journal article supplement (PMC8361088; doi:10.1038/s41541-021-00367-8), 2021-08-12
Supplement: 41541_2021_367_MOESM1_ESM.pdf [file 41541_2021_367_MOESM1_ESM.pdf]

1 **Oral vaccination stimulates neutrophil functionality and exerts protection in a**  
2 ***Mycobacterium avium* subsp. *paratuberculosis* infection model**

3 Iraia Ladero-Auñon<sup>1,2</sup>, Elena Molina<sup>1</sup>, Maddi Oyanguren<sup>1</sup>, Diego Barriaes<sup>3</sup>, Miguel Fuertes<sup>1</sup>, Iker  
4 A Sevilla<sup>1</sup>, Lucy Luo<sup>4</sup>, Rake! Arrazuria<sup>4</sup>, Jeroen De Buck<sup>4</sup>, Juan Anguita<sup>3,5</sup>, Natalia Elguezabal<sup>1\*</sup>

5 <sup>1</sup>Animal Health Department, Basque Institute for Agricultural Research and Development,  
6 NEIKER- Basque Research and Technology Alliance (BRTA), (Derio) Bizkaia, Spain

7 <sup>2</sup>Food Quality and Safety Department, Universidad del País Vasco/Euskal Herriko  
8 Unibertsitatea (UPV/EHU), (Vitoria) Araba, Spain

9 <sup>3</sup>Inflammation and Macrophage Plasticity Laboratory, CIC bioGUNE-Basque Research and  
10 Technology Alliance (BRTA), (Derio) Bizkaia, Spain

11 <sup>4</sup>Department of Production Animal Health, Faculty of Veterinary Medicine, University of  
12 Calgary, Calgary, AB T2N1N4, Canada

13 <sup>5</sup>Ikerbasque, Basque Foundation for Science, Bilbao, Spain

14

15 \*Corresponding author: nelguezabal@neiker.eus

16

17

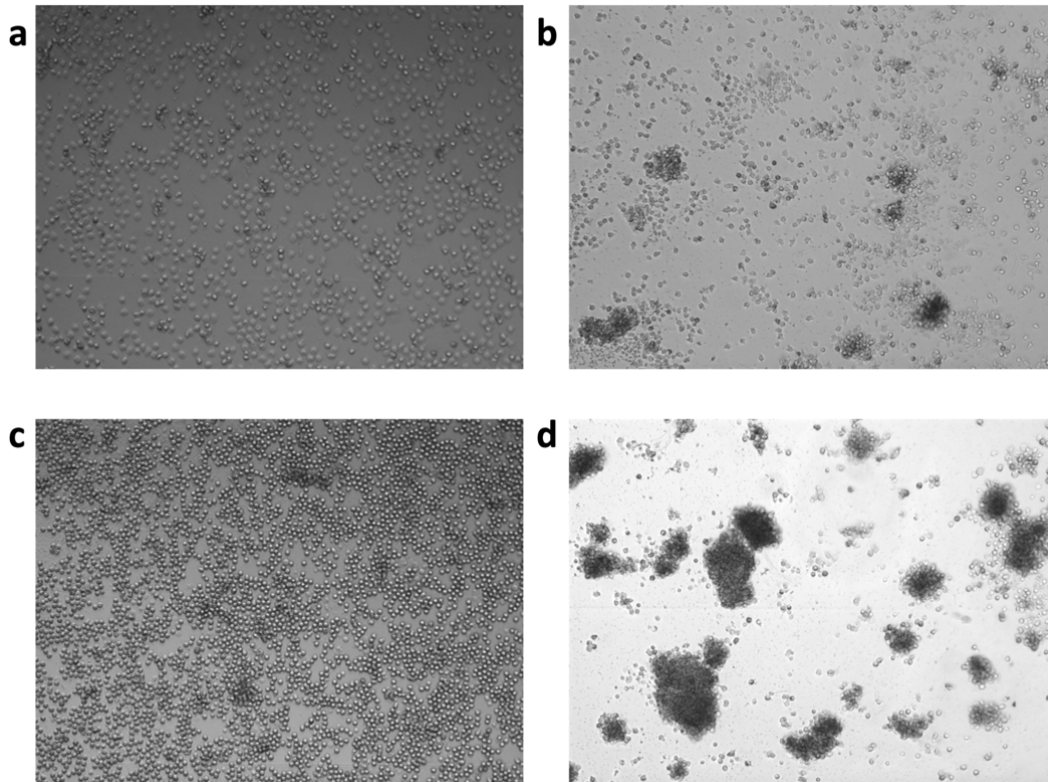

18

19 **Supplementary Figure 1.** Light microscopy micrographs (10x) of PMN preparations at PV1 of  
20 NV (a-b) and CV (c-d) stimulated with PMA (a, c) and Map (b, d).

21

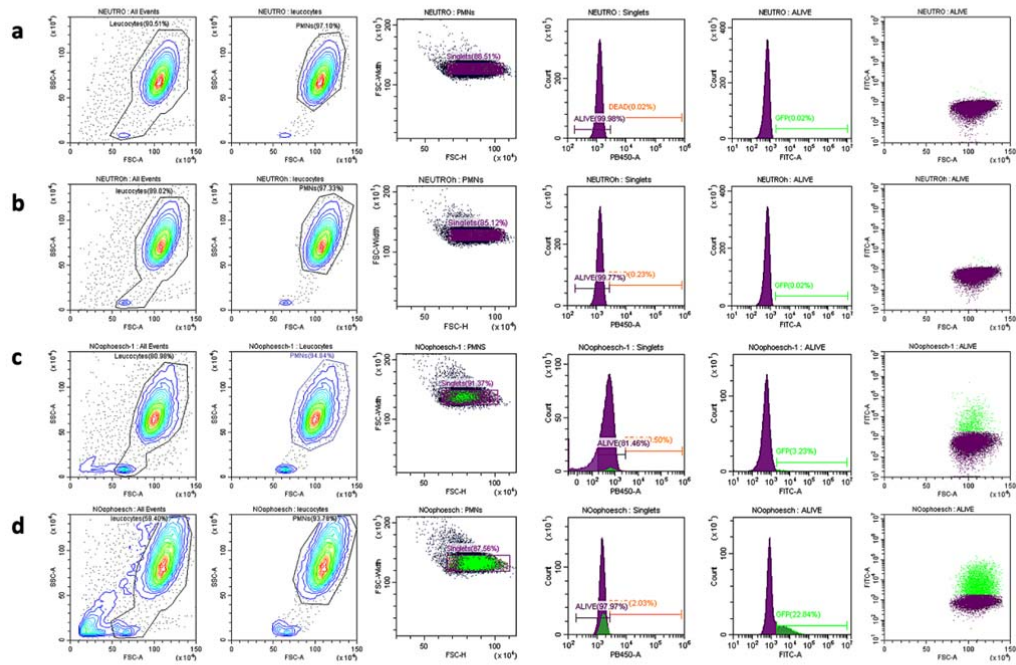

22  
 23 **Supplementary Figure 2.** Gating strategy used for the phagocytosis analysis. (a) PMNs without  
 24 live-dead staining and without Map-GFP, (b) PMNs with live-dead staining and without Map-  
 25 GFP, (c) PMNs of the NC group with live-dead staining and with Map-GFP, (d) PMNs of the NC  
 26 group with live-dead staining and with Map-GFP. In the first column details about leukocyte  
 27 gating based on FSC and SSC; in the second step PMN-gating based on FSC and SSC (purity  
 28 information); in the third column doublet discrimination strategy; in the fourth column dead  
 29 cell discrimination strategy by fluorescence in the PB450 channel; in the fifth column GFP  
 30 associated PMN selection by fluorescence in the FITC channel and in the sixth column a scatter  
 31 plot based on FITC-FSC of single-alive-PMNs.

32

33

**a NORMFINDER**

**INTRA-GROUP VARIATION**

| GROUP | RPLP0  | PGK1   | IPO8   | UBE2D1 | YWHAZ  |
|-------|--------|--------|--------|--------|--------|
| 1     | 0,1683 | 0,1042 | 0,0302 | 0,0353 | 0,0058 |
| 2     | 0,0122 | 0,0449 | 0,0067 | 0,0135 | 0,0041 |
| 3     | 0,0464 | 0,0873 | 0,0378 | 0,008  | 0,0059 |
| 4     | 0,0034 | 0,0397 | 0,073  | 0,0279 | 0,0076 |
| 5     | 0,0112 | 0,0257 | 0,0363 | 0,0323 | 0,0058 |
| 6     | 0,4562 | 1,7302 | 0,4972 | 0,014  | 0,014  |
| 7     | 0,0189 | 0,0102 | 0,0066 | 0,0215 | 0,0054 |

**INTER-GROUP VARIATION**

| GROUP | RPLP0   | PGK1    | IPO8    | UBE2D1  | YWHAZ   |
|-------|---------|---------|---------|---------|---------|
| 1     | 0,0741  | -0,1965 | 0,1579  | 0,1464  | -0,1819 |
| 2     | -0,0754 | 0,0805  | 0,0968  | 0,0003  | -0,1022 |
| 3     | -0,026  | 0,024   | -0,1301 | -0,0969 | 0,229   |
| 4     | -0,1089 | 0,0837  | 0,1206  | -0,0144 | -0,081  |
| 5     | -0,031  | 0,1238  | -0,1462 | -0,0216 | 0,0749  |
| 6     | 0,1406  | -0,2587 | 0,0242  | -0,0896 | 0,1835  |
| 7     | 0,0266  | 0,1432  | -0,1232 | 0,0757  | -0,1222 |

**b**

Best gene: YWHAZ, SD: 0,0592

Best Combination of two genes: YWHAZ + UBE2D1, SD: 0,0492

| Gene Name | SD     | Acc. SD | SD        | 0,1993 |
|-----------|--------|---------|-----------|--------|
| YWHAZ     | 0,1993 | 0,1993  |           |        |
| RPLP0     | 0,2054 | 0,1431  | Best Gene | YWHAZ  |
| IPO8      | 0,234  | 0,1232  |           |        |
| UBE2D1    | 0,2738 | 0,115   |           |        |

BEST NUMBER OF GENES 4: YWHAZ, RPLP0, IPO8 AND UBE2D1

**c**

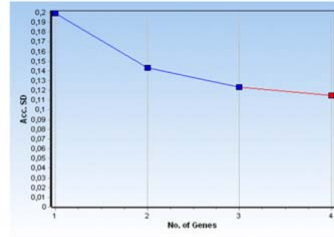

**d GENORM**

| Gene Name | M-Value    |
|-----------|------------|
| PGK1      | 0,41026624 |
| UBE2D1    | 0,3222696  |
| YWHAZ     | 0,29957556 |
| RPLP0     | 0,2594786  |
| IPO8      | 0,2594786  |

34

35

36

37

38

39

40

41

42

43

44

**Supplementary Figure 3.** Best reference gene combination analysis for normalization of RT-qPCR expression in PBMC samples at PV1 (a) NormFinder Intra-group and inter-group variation results. PGK1 gene showed high intra-group variation (>1) in the group 6. All the genes showed low inter-group variation. (b) NormFinder provided best gene, best combination of two genes and best number of reference genes information after elimination of PGK1, the less stable gene. (c) NormFinder graph representation of the best number of reference genes for normalization. (d) GeNorm analysis results. In this case all five genes showed high stability M values (<0.5). UBE2D1, YWHAZ, RPLP0 and IPO8 resulted the most suitable combination of reference genes.

**a** NORMFINDER

INTRA-GROUP VARIATION

| GROUP | RPLPO  | PGK1   | IPO8   | UBE2D1 | YWHAZ  |
|-------|--------|--------|--------|--------|--------|
| 8     | 0,0352 | 0,7615 | 0,1016 | 0,0972 | 0,0127 |
| 9     | 0,0042 | 0,7171 | 0,0297 | 0,7916 | 0,0042 |
| 10    | 0,0113 | 0,5967 | 0,0703 | 0,0078 | 0,0938 |
| 11    | 0,0114 | 0,367  | 0,038  | 0,258  | 0,0025 |
| 12    | 0,0173 | 1,5236 | 0,2161 | 0,2885 | 0,0032 |
| 13    | 0,0011 | 0,0888 | 0,015  | 0,285  | 0,0011 |
| 14    | 0,0158 | 0,048  | 0,1075 | 0,1888 | 0,0043 |
| 15    | 0,0022 | 0,4484 | 0,0219 | 0,1843 | 0,0158 |
| 16    | 0,0051 | 0,3938 | 0,0139 | 0,6346 | 0,0038 |
| 17    | 0,0081 | 0,2347 | 0,1658 | 0,1034 | 0,0011 |
| 18    | 0,0013 | 0,3623 | 0,0047 | 0,2272 | 0,0047 |
| 19    | 0,02   | 0,8371 | 0,0074 | 0,3378 | 0,0833 |
| 20    | 0,0044 | 0,3953 | 0,0703 | 0,2661 | 0,0639 |
| 21    | 0,0495 | 0,2595 | 0,0248 | 0,0636 | 0,0142 |
| 22    | 0,0243 | 0,2453 | 0,2022 | 0,3008 | 0,0313 |
| 23    | 0,005  | 0,1625 | 0,0282 | 0,5198 | 0,009  |
| 24    | 0,0196 | 0,2367 | 0,0095 | 0,3069 | 0,0658 |
| 25    | 0,0545 | 0,2687 | 0,0178 | 0,3248 | 0,0003 |
| 26    | 0,0085 | 0,4509 | 0,0425 | 0,3538 | 0,0125 |
| 27    | 0,0096 | 0,6041 | 0,5031 | 0,1621 | 0,0052 |
| 28    | 0,0247 | 0,3973 | 0,0019 | 0,1454 | 0,0077 |

INTER-GROUP VARIATION

| GROUP | RPLPO   | PGK1    | IPO8    | UBE2D1  | YWHAZ   |
|-------|---------|---------|---------|---------|---------|
| 8     | -0,0345 | 0,1349  | -0,0017 | 0,0567  | -0,1554 |
| 9     | -0,1554 | 0,1091  | -0,1506 | 0,2247  | -0,0279 |
| 10    | 0,0221  | 0,009   | 0,2172  | -0,1455 | -0,1028 |
| 11    | 0,0673  | 0,266   | 0,0822  | -0,3979 | -0,0176 |
| 12    | -0,0304 | 0,4033  | 0,007   | -0,1862 | -0,1938 |
| 13    | -0,1709 | 0,1903  | 0,0789  | -0,0075 | -0,0908 |
| 14    | 0,3102  | -0,3317 | 0,0803  | -0,1489 | 0,0902  |
| 15    | 0,1004  | 0,0473  | -0,0705 | -0,0155 | -0,0617 |
| 16    | -0,0978 | -0,1561 | -0,111  | 0,3094  | 0,0556  |
| 17    | -0,0063 | -0,2581 | 0,1219  | 0,0071  | 0,1353  |
| 18    | 0,1855  | 0,1967  | -0,3319 | -0,1437 | 0,0934  |
| 19    | 0,0266  | 0,2798  | -0,1337 | -0,1091 | -0,0636 |
| 20    | 0,0299  | 0,5059  | -0,2628 | -0,0961 | -0,1768 |
| 21    | 0,1646  | -0,2854 | -0,0399 | 0,038   | 0,1226  |
| 22    | 0,1137  | 0,028   | 0,0742  | -0,1212 | -0,0947 |
| 23    | -0,1999 | -0,6469 | 0,0868  | 0,5905  | 0,1696  |
| 24    | -0,1565 | -0,4701 | 0,2154  | -0,167  | 0,2442  |
| 25    | 0,0217  | -0,2095 | 0,0532  | 0,0053  | 0,1293  |
| 26    | -0,1587 | -0,1889 | 0,1523  | -0,126  | 0,0692  |
| 27    | -0,1627 | 0,4748  | -0,0076 | -0,0856 | -0,2189 |
| 28    | 0,131   | -0,0982 | -0,0598 | -0,0675 | 0,0945  |

**b** Best gene: YWHAZ, SD: 0,1607

Best Combination of two genes: YWHAZ + RPLPO, SD: 0,1356

| Gene Name | SD     | Acc. SD | SD        | 0,1384 |
|-----------|--------|---------|-----------|--------|
| YWHAZ     | 0,1384 | 0,1384  |           |        |
| RPLPO     | 0,2403 | 0,1386  | Best Gene | YWHAZ  |
| IPO8      | 0,288  | 0,1333  |           |        |
| UBE2D1    | 0,4952 | 0,1591  |           |        |

Best number of genes: 3: YWHAZ, RPLPO AND IPO8

**c**

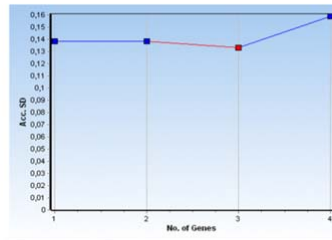

**d** GENORM

| Gene Name | M-Value    |
|-----------|------------|
| PGK1      | 0,5452308  |
| UBE2D1    | 0,41544932 |
| IPO8      | 0,30437022 |
| RPLPO     | 0,27670814 |
| YWHAZ     | 0,27670814 |

45

46 **Supplementary Figure 4.** Best reference gene combination analysis for normalization of RT-  
 47 qPCR expression in PBMC samples at PV1 after 24h stimulation, (a) NormFinder Intra-group  
 48 and inter-group variation results. PGK1 gene showed a high intra-group variation (>1) in the  
 49 group 12 and the highest inter-group variation, (b) NormFinder provided information about  
 50 best gene, best combination of two genes and best number of reference genes after  
 51 elimination of PGK1, the less stable gene, (c) NormFinder graph representation of the best  
 52 number of reference genes for normalization, (d) GeNorm analysis results. PGK1 gene showed  
 53 insufficient stability M value (>0.5). YWHAZ, RPLPO and IPO8 resulted the best combination of  
 54 reference genes.

55

**a NORMFINDER**

INTRA-GROUP VARIATION

| GROUP | RPLP0  | PGK1   | IPO8   | UBE2D1 | YWHAZ  |
|-------|--------|--------|--------|--------|--------|
| 1     | 0,054  | 0,0317 | 0,1988 | 0,0034 | 0,001  |
| 2     | 0,0187 | 0,0086 | 0,03   | 0,0249 | 0,0233 |
| 3     | 0,0459 | 0,031  | 0,05   | 0,0256 | 0,0048 |
| 4     | 0,0458 | 0,0144 | 0,1639 | 0,0045 | 0,0062 |
| 5     | 0,0397 | 0,0663 | 0,1354 | 0,0175 | 0,0056 |
| 6     | 0,0178 | 0,0162 | 0,0518 | 0,0076 | 0,0237 |
| 7     | 0,0233 | 0,0564 | 0,0531 | 0,0033 | 0,0037 |

INTER-GROUP VARIATION

| GROUP | RPLP0   | PGK1    | IPO8    | UBE2D1  | YWHAZ   |
|-------|---------|---------|---------|---------|---------|
| 1     | 0,126   | 0,0637  | -0,4896 | 0,1949  | 0,105   |
| 2     | -0,1915 | -0,0592 | 0,3374  | 0,0344  | -0,1211 |
| 3     | -0,0716 | -0,0128 | 0,0796  | 0,0137  | -0,0089 |
| 4     | 0,031   | 0,0167  | 0,0288  | -0,0661 | -0,0103 |
| 5     | -0,1075 | -0,0124 | 0,1359  | 0,0109  | -0,0269 |
| 6     | -0,0183 | -0,0126 | -0,0173 | -0,0528 | 0,1011  |
| 7     | 0,2319  | 0,0167  | -0,0748 | -0,1349 | -0,0389 |

**b** Best gene: YWHAZ, SD: 0,1067

Best Combination of two genes: YWHAZ + PGK1, SD: 0,1023

| Gene Name | SD     | Acc. SD | SD | Best Gene |
|-----------|--------|---------|----|-----------|
| YWHAZ     | 0,0815 | 0,0815  |    | YWHAZ     |
| UBE2D1    | 0,1202 | 0,0726  |    |           |
| PGK1      | 0,1424 | 0,0678  |    |           |
| RPLP0     | 0,223  | 0,0755  |    |           |
| IPO8      | 0,3968 | 0,0997  |    |           |

BEST NUMBER OF GENES: 3, YWHAZ, UBE2D1 Y PGK1

**c**

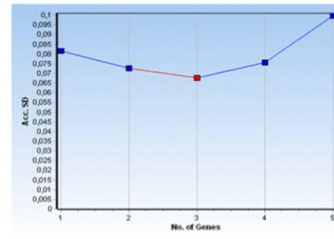

**d GENORM**

| Gene Name | M-Value    |
|-----------|------------|
| IPO8      | 0,28872698 |
| UBE2D1    | 0,20994529 |
| RPLP0     | 0,18509162 |
| PGK1      | 0,17329171 |
| YWHAZ     | 0,17329171 |

56

57 **Supplementary Figure 5.** Best reference gene combination analysis for normalization of RT-  
 58 qPCR expression in GALT samples. (a) NormFinder Intra-group and inter-group variation  
 59 results. All five genes are highly stable, (b) NormFinder provided information about stability  
 60 values not considering groups, best reference gene, best combination of two genes and best  
 61 number of reference genes, (c) NormFinder graph representation of the best number of  
 62 reference genes for normalization, (d) GeNorm analysis results. In this case all five genes  
 63 showed high stability  $M < 0.5$ . Although the best number of recommended reference genes was  
 64 three, as the difference in their M values was small, the normalization was performed with  
 65 YWHAZ, PGK1, UBE2D1 and RPLP0.

66

67 **Supplementary Table 1.** Primer sequences for each gene, amplicon characteristic and PCR  
 68 conditions.

69 **Supplementary Table 1.** Primer sequences for each gene, amplicon characteristic and PCR conditions.

| Target gene<br>(amplicon size) | Sequences                     | Tm <sup>o</sup> C | GC%  | PC (μM) |
|--------------------------------|-------------------------------|-------------------|------|---------|
| <i>IFN-γ</i><br>(122)          | 5'TACTTTGGCATGGACTGTATT3'     | 58.6              | 38   | 0.7     |
|                                | 5'CATAAAGCATGGTGGAGAA3'       | 58.7              | 42.1 | 0.7     |
| <i>IL-1β</i><br>(152)          | 5'CTCCTGCCAACCCTACAACA3'      | 57.1              | 55   | 0.3     |
|                                | 5'GGACGGGTTCTTCTTCAA3'        | 52.4              | 50   | 0.3     |
| <i>IL-2</i><br>(205)           | 5'TATATGCCCAAGAAGGTCACA3'     | 61.9              | 42.8 | 0.4     |
|                                | 5'TGGTAACTGTCTCATCGTATTCAC3'  | 61.8              | 41.6 | 0.4     |
| <i>IL-4</i><br>(90)            | 5'CAGTTCTACCTCCACCACAAG3'     | 61.2              | 52.3 | 0.2     |
|                                | 5'GTTCTGTTCGAGTCCTCTC3'       | 58.9              | 57.8 | 0.2     |
| <i>IL-10</i><br>(98)           | 5'GCGACAATGTCACCGATTT3'       | 63.6              | 47.3 | 0.7     |
|                                | 5'TGTAGACGCCTTCTCTTG3'        | 60.6              | 52.6 | 0.7     |
| <i>IL-12A</i><br>(64)          | 5'CATCAGAGACATCATCAAACCT3'    | 60.6              | 40.9 | 0.5     |
|                                | 5'GGAATTCTTCAATGGCTTCA3'      | 61.6              | 40   | 0.5     |
| <i>TNF</i><br>(154)            | 5'CTAGCCCACGTAGTAGCAAAC3'     | 60.4              | 52.3 | 0.5     |
|                                | 5'AGAGAACCTGGGAGTAGATGAG3'    | 60.3              | 50   | 0.5     |
| <i>IL23A</i><br>(170)          | 5'CAGCAGCTCTCCAGAA3'          | 56.2              | 58.8 | 0.5     |
|                                | 5'AACTGAGTGTGCCCTTAGTC3'      | 55.8              | 45.5 | 0.3     |
| <i>RPLP0</i><br>(111)          | 5'CGTGAGAGTGACATCGTCTTTA3'    | 61.9              | 45.4 | 0.3     |
|                                | 5'GGATGATCTTAAGGAAGTAGTTGGA3' | 62.3              | 40   | 0.3     |
| <i>PGK1</i><br>(112)           | 5'TGGGCAAGGATGTTCTGTT3'       | 63.2              | 47.3 | 0.4     |
|                                | 5'ACATGAAAGCGGAGGTTCT3'       | 61.3              | 47.3 | 0.4     |
| <i>YWHAZ</i><br>(136)          | F 5'GCCCTTAACTTCTCTGTGTTCT3'  | 60.4              | 45.4 | 0.4     |
|                                | 5'GCGTGCTGTCTTTGTATGATTC3'    | 63.5              | 45.4 | 0.4     |
| <i>IPO8</i><br>(100)           | 5'AGCTAGATCGTGCTGGGTA3'       | 60                | 52.6 | 0.3     |
|                                | 5'GATCAGGCTCTTCTGGCTAAT3'     | 62.5              | 45.4 | 0.2     |
| <i>UBE2D1</i><br>(82)          | F 5'CCTGTGGGAGATGACTTGTTCT3'  | 63.5              | 52.3 | 0.5     |
|                                | R 5'GGAAGAAGACTCCACCTTGATA3'  | 61.1              | 45.4 | 0.5     |

70

71 Tm: primer melting temperature; PC: primer concentration. For primer design, exon-exon junctions were taken into  
 72 account, with at least one of each primer pairs between two exons. Target transcript sequences were obtained from  
 73 the NCBI database. Dimers and hairpins were checked with IDT Oligo Analyzer Tools  
 74 (<https://eu.idtdna.com/site/account/login?returnurl=%2Fcalc%2Falyzer>) and those with high possibilities of  
 75 conforming secondary structures were discarded. Primer selection parameters were set to be: no more than 3 Gs or  
 76 Cs in the last five nucleotides of the 3' end, CG% between 40-60%, primer size between 17-25 nts, Tm differences  
 77 between primer pairs of less than 2°C and product size 100-200 bp but down to 64 in a case where no suitable  
 78 primers could be identified. Primers were ordered from Sigma-Aldrich and each pair was cross-tested for optimal  
 79 working concentrations ranging 0.2-0.7 μM.

80

81

82
